# Supplementary material
Source: ML conference proceedings conference paper supplement (https://proceedings.mlr.press/v37/miyauchi15.html)
Supplement: Supplementary file [file miyauchi15-supp.pdf]

---

## Supplementary Material: Threshold Influence Model for Allocating Advertising Budgets

---

**Atsushi Miyauchi**

MIYAUCHI.A.AA@M.TITECH.AC.JP

Graduate School of Decision Science and Technology, Tokyo Institute of Technology, Japan

**Yuni Iwamasa**

YUNIIWAMASA@MIST.I.U-TOKYO.AC.JP

Graduate School of Information Science and Technology, University of Tokyo, Japan

**Takuro Fukunaga**

TAKURO@NII.AC.JP

National Institute of Informatics and JST, ERATO, Kawarabayashi Large Graph Project, Japan

**Naonori Kakimura**

KAKIMURA@GLOBAL.C.U-TOKYO.AC.JP

Graduate School of Arts and Sciences, University of Tokyo, Japan

### A. Proof of Theorem 1 (in Section 2)

*Proof.* We reduce the maximum thresholds coverage problem to the cost-effective version of the problem. Suppose that we are given a bipartite graph  $G = (S, T; E)$  with weight  $w_t$  and threshold  $\theta_t$  for each  $t \in T$  and budget  $k$  being a positive integer. We consider the unweighted case, i.e.,  $w_t = 1$  for each  $t \in T$ . We add  $p > k \cdot |T|$  new nodes  $u_1, \dots, u_p$  to  $T$ . Each vertex  $u_i$  is connected to all the nodes in  $S$ , and has threshold  $\theta_{u_i} = k$ . The resulting graph is denoted by  $G'$ . Note that  $f_{G'}(X) = f_G(X)$  if  $|X| < k$  and  $f_{G'}(X) = f_G(X) + p$  otherwise.

We claim that any most cost-effective solution for  $G'$  has to have size  $k$ . Indeed, for any  $X, Y \subseteq S$  with  $|X| < k$  and  $|Y| = k$ ,

$$\frac{f_{G'}(X)}{|X|} \leq |T| < \frac{p}{k} \leq \frac{f_G(Y) + p}{|Y|} = \frac{f_{G'}(Y)}{|Y|}.$$

Moreover, for any  $X, Y \subseteq S$  with  $|X| > k$  and  $|Y| = k$ ,

$$\frac{f_{G'}(X)}{|X|} \leq \frac{|T| + p}{|X|} < \frac{p}{k} \leq \frac{f_G(Y) + p}{|Y|} = \frac{f_{G'}(Y)}{|Y|}.$$

Thus the claim holds.

Therefore, a vertex subset  $X$  is the most cost-effective solution for  $G'$  if and only if  $X$  is an optimal solution for  $G$ . Thus the theorem holds.  $\square$

### B. Proof of Lemma 1 (in Section 3)

*Proof.* For each  $s \in S$ , we make  $u_s$  copies  $(s, 1), \dots, (s, u_s)$  of  $s$ , and connect each  $(s, i)$  to the neighbors of  $s$  in  $G$ . The resulting graph is denoted by  $\tilde{G}$ , which has node sets  $\tilde{S} = \{(s, i) \mid s \in S, i = 1, \dots, u_s\}$  and  $T$ . From the given function  $f_t: \mathbb{Z}_+^{\Gamma(t)} \rightarrow \mathbb{R}$ , construct a set function  $\tilde{f}_t: 2^{\tilde{S}_t} \rightarrow \mathbb{R}$  as mentioned in the main text, where  $\tilde{S}_t = \{(s, i) \mid s \in \Gamma(t), i \in \{0, 1, \dots, u_s\}\}$ . Moreover, we define the cost  $c(s, i) = c_s i$  as the weight of  $(s, i) \in \tilde{S}$ . Then consider solving this problem to find a solution  $X \subseteq \tilde{S}$  that satisfies  $\sum_{(s, i) \in X} c(s, i) \leq B$  and maximizes  $\tilde{f}(X)$ . Suppose that  $X \subseteq \tilde{S}$  is an  $\alpha$ -approximate solution for the problem. The corresponding vector is denoted by  $x$ . Then we have  $f(x) = \tilde{f}(X)$  and  $\sum_{s \in S} c_s x_s \leq \sum_{(s, i) \in X} c_s i \leq B$ . Hence  $x$  is a feasible solution to the original instance, whose objective value is  $f(x)$ . Since the optimal value to the original instance is equal to that of the reduced instance,  $x$  is an  $\alpha$ -approximate solution to the original instance.

Since  $|\tilde{S}| = \sum_{s \in S} u_s$ , the size of the reduced problem is pseudo-polynomial in the input size. Thus the obtained instance has size pseudo-polynomial in the input size.  $\square$

### C. Proof of Theorem 2 (in Section 3)

*Proof.* First suppose that  $c_s = 1$  for each  $s \in S$  and  $w_t = 1$  for each  $t \in T$ . Then the contribution  $\Delta(X, s)$  is always an integer from 0 to  $|T|$ . We maintain  $|T| + 1$  doubly-linked lists, each of which contains source nodes with the same contribution. Each iteration of Algorithm 2 involves identifying and removing the node with the smallest contribution, and updating the lists.

We can find  $s^*$  with the smallest contribution in  $O(|\Gamma(s^*)|)$  time by checking the lists from below, and remove it from the list in constant time. For each  $t \in \Gamma(s^*)$ , we compute the value of  $f_t$  in  $\beta$  time, and check whether it still exceeds the threshold  $\theta_t$ . If it is lower than  $\theta_t$ , we move the source nodes in  $\Gamma(t)$  to the appropriate lists, which can be done in  $O(|\Gamma(t)|)$  time. Note that for each node in  $T$ , this happens at most once.

Thus, the algorithm runs in  $O(|S| + |T| + \beta|E|)$ . Using a similar argument, when the weights are integers, the running time becomes  $O(|S| + \beta|E| + W)$ .

When  $c_s$ 's are integers, we maintain a priority queue of the source nodes. Throughout the algorithm, we need  $|S|$  insert operations,  $|S|$  delete-min operations, and  $|E|$  decrease-key operations. If we use a Fibonacci heap (Fredman & Tarjan, 1987), the algorithm runs in  $O(|S| \log |S| + |T| + \beta|E|)$ .  $\square$

### D. Proof of Theorem 3 (in Section 3)

*Proof.* Suppose that  $f$  is monotone and submodular. It is easy to see that  $\tilde{f}$  is monotone. Let us prove the submodularity of  $\tilde{f}$ . Let  $X, Y \subseteq \tilde{S}$ , and  $x, y$  be the corresponding vectors defined in the main text, respectively. Then  $\tilde{f}(X) = f(x)$  and  $\tilde{f}(Y) = f(y)$  hold by the definition of  $\tilde{f}$ . For each  $s \in S$ ,  $\max\{i \in \mathbb{Z}_+ \mid (s, i) \in X \cup Y\}$  is equal to the maximum of  $x(s)$  and  $y(s)$ , and  $\max\{i \in \mathbb{Z}_+ \mid (s, i) \in X \cap Y\}$  is not larger than the minimum of  $x(s)$  and  $y(s)$ . The former fact implies  $\tilde{f}(X \cup Y) = f(x \vee y)$ , and the latter one implies  $\tilde{f}(X \cap Y) \leq f(x \wedge y)$  together with the monotonicity of  $f$ . Therefore, we have

$$\tilde{f}(X) + \tilde{f}(Y) = f(x) + f(y) \geq f(x \vee y) + f(x \wedge y) \geq \tilde{f}(X \cup Y) + \tilde{f}(X \cap Y).$$

Next, suppose that  $\tilde{f}$  is monotone and submodular. For vectors  $x, y \in \mathbb{Z}_+^S$ , define  $X = \{(s, i) \mid s \in S, i \leq x(s)\}$  and  $Y = \{(s, i) \mid s \in S, i \leq y(s)\}$ . Then  $\tilde{f}(X) = f(x)$  and  $\tilde{f}(Y) = f(y)$ . Moreover, we have  $\tilde{f}(X \cap Y) = f(x \wedge y)$  and  $\tilde{f}(X \cup Y) = f(x \vee y)$ . These relationships show

$$f(x) + f(y) = \tilde{f}(X) + \tilde{f}(Y) \geq \tilde{f}(X \cup Y) + \tilde{f}(X \cap Y) = f(x \vee y) + f(x \wedge y).$$

If  $x \leq y$ , then  $X \subseteq Y$  holds, and hence  $f(x) \leq f(y)$  follows from  $\tilde{f}(X) \leq \tilde{f}(Y)$ . Therefore,  $f$  is monotone and submodular.  $\square$

### E. Pseudo-Polynomial-Time ( $e/(e-1)$ )-Approximation Algorithm for the Submodular Maximization over Integer Lattice (in Section 3)

Consider maximizing a monotone submodular function  $f(x)$  over integer lattice subject to a budget constraint  $\sum_{i \in S} c_i x_i \leq B$  and an upper bound  $x \leq u$ . From the given monotone submodular function  $f: \mathbb{Z}_+^S \rightarrow \mathbb{R}$ , construct a set function  $\tilde{f}: 2^{\tilde{S}} \rightarrow \mathbb{R}$  as mentioned in the main text, where  $\tilde{S} = \{(s, i) \mid s \in S, i \in \{0, 1, \dots, u(s)\}\}$ . Moreover, we regard a cost  $c(s, i) = c_s i$  as the weight of  $(s, i) \in \tilde{S}$ . Then solve the submodular maximization problem with a budget constraint to find a solution  $X \subseteq \tilde{S}$  that satisfies  $\sum_{(s, i) \in X} c(s, i) \leq B$  and maximizes  $\tilde{f}(X)$ . Suppose that  $X \subseteq \tilde{S}$  is an  $\alpha$ -approximate solution for the problem. Then, letting  $x$  be the corresponding vector, we have  $f(x) = \tilde{f}(X)$  and  $\sum_{s \in S} c(s, x_s) \leq \sum_{(s, i) \in X} c(s, i) \leq B$ . Therefore,  $x$  is an  $\alpha$ -approximate solution to the original instance. Since the reduced problem has an  $(e/(e-1))$ -approximation algorithm running in polynomial time, we obtain an  $(e/(e-1))$ -approximation algorithm that runs in pseudo-polynomial time.

## F. Proof of Theorem 4 (in Section 4)

*Proof.* Let  $X^* \subseteq S$  be an optimal solution for the problem. Choose an arbitrary node  $s \in X^*$ . Then, by the optimality of  $X^*$ , it holds that

$$d(X^*) = \frac{f(X^*)}{c(X^*)} \geq \frac{f(X^* \setminus \{s\})}{c(X^*) - c_s}.$$

By using the fact  $f(X^* \setminus \{s\}) \geq f(X^*) - \sum_{t \in T(X^*) \cap \Gamma(s)} w_t$ , this can be transformed to  $(c(X^*) - c_s)d(X^*) \geq f(X^*) - \sum_{t \in T(X^*) \cap \Gamma(s)} w_t$ . Since  $f(X^*) = c(X^*)d(X^*)$ , we have

$$d(X^*) \leq \Delta(X^*, s). \quad (\text{F.1})$$

Consider the first iteration when some node  $s^* \in X^*$  is removed by the algorithm. Let  $X$  denote the subset of nodes at this moment just before the removal. Clearly, we have  $X^* \subseteq X$ . Let us choose an arbitrary node  $s \in X$ . Then  $\Delta(X, s) \geq \Delta(X, s^*)$  holds by the choice of  $s^*$ . Moreover,  $\Delta(X, s^*) \geq \Delta(X^*, s^*)$  because  $T(X) \supseteq T(X^*)$ . Combining with (F.1), we have  $\Delta(X, s) \geq \Delta(X, s^*) \geq \Delta(X^*, s^*) \geq d(X^*)$ .

Therefore, we obtain

$$\begin{aligned} d(X) &= \frac{1}{c(X)} \sum_{t \in T(X)} w_t \geq \frac{1}{\gamma c(X)} \sum_{s \in X} \sum_{t \in T(X) \cap \Gamma(s)} w_t \\ &= \frac{1}{\gamma c(X)} \sum_{s \in X} c_s \Delta(X, s) \geq \frac{1}{\gamma c(X)} \sum_{s \in X} c_s d(X^*) = \frac{1}{\gamma} d(X^*). \end{aligned}$$

Thus the output is  $\gamma$ -approximation.  $\square$

## G. Proof of Lemma 2 (in Section 4)

*Proof.* For  $X \subseteq S$ , we construct a solution  $(\bar{x}, \bar{y})$  of (LP) as follows:

$$\bar{x}_s = \begin{cases} \frac{1}{|X|} & s \in X, \\ 0 & \text{otherwise,} \end{cases} \quad \bar{y}_t = \begin{cases} \frac{1}{|X|} & t \in T(X), \\ 0 & \text{otherwise.} \end{cases}$$

The first constraints in (LP) are satisfied. Indeed, if  $t \in T(X)$  (i.e.,  $\bar{y}_t = \frac{1}{|X|}$ ), then we have  $|X \cap \Gamma(t)| \geq \theta_t$ , which implies that for any  $J \subseteq \Gamma(t)$  with  $|J| = p_t$ , there exists  $s \in J$  that satisfies  $s \in X$  (i.e.,  $\bar{x}_s = \frac{1}{|X|}$ ). The second constraint in (LP) is also satisfied because  $\sum_{s \in S} x_s = \sum_{s \in X} x_s = 1$ . Therefore,  $(\bar{x}, \bar{y})$  is feasible for (LP). The objective value of  $(\bar{x}, \bar{y})$  is

$$\sum_{t \in T} w_t \bar{y}_t = \sum_{t \in T(X)} w_t \bar{y}_t = \frac{1}{|X|} \sum_{t \in T(X)} w_t = d(X).$$

This completes the proof.  $\square$

## H. Proof of Lemma 3 (in Section 4)

*Proof.* We begin by showing the existence of  $r \geq 0$  that satisfies  $d(X(r)) \geq \lambda/p$ . Without loss of generality, we can assume that  $\bar{y}_t = \min\{\sum_{s \in J} \bar{x}_s \mid J \subseteq \Gamma(t), |J| = p_t\}$  for each  $t \in T$ . We define a sequence of subsets  $Y(r) = \{t \in T \mid \bar{y}_t \geq r\}$ . If  $t \in Y(r)$ , then  $\min\{\sum_{s \in J} \bar{x}_s \mid J \subseteq \Gamma(t), |J| = p_t\} \geq r$ , which means that the  $p_t$ th smallest  $\bar{x}_s$  is at least  $r/p_t \geq r/p$ . Hence at least  $|\Gamma(t)| - p_t + 1 = \theta_t$  elements in  $\Gamma(t)$  are contained in  $X(r)$ . Thus we see that  $Y(r) \subseteq T(X(r))$ .

Since for any  $r \geq 0$ ,

$$\frac{1}{|X(r)|} \sum_{t \in T(X(r))} w_t \geq \frac{1}{|X(r)|} \sum_{t \in Y(r)} w_t,$$

it suffices to show that there exists  $r \geq 0$  such that

$$\frac{1}{|X(r)|} \sum_{t \in Y(r)} w_t \geq \frac{\lambda}{p}.$$

Suppose not, that is, for any  $r \geq 0$ ,

$$\sum_{t \in Y(r)} w_t < \frac{\lambda}{p} \cdot |X(r)|. \quad (\text{H.2})$$

For each  $t \in T$ , define an indicator function  $Z_t(r) : [0, 1] \rightarrow \{0, 1\}$  to be 1 if  $r \leq \bar{y}_t$  and 0 otherwise. Integrating the left-hand side of (H.2) from 0 to 1, we have

$$\int_0^1 \left( \sum_{t \in Y(r)} w_t \right) dr = \int_0^1 \left( \sum_{t \in T} w_t Z_t(r) \right) dr = \sum_{t \in T} w_t \int_0^1 Z_t(r) dr = \sum_{t \in T} w_t \bar{y}_t = \lambda.$$

On the other hand, for each  $s \in S$ , define an indicator function  $Z_s(r) : [0, p] \rightarrow \{0, 1\}$  to be 1 if  $r/p \leq \bar{x}_s$  and 0 otherwise. Integrating the right-hand side of (H.2) from 0 to 1, we have

$$\frac{\lambda}{p} \int_0^1 |X(r)| dr = \frac{\lambda}{p} \int_0^1 \left( \sum_{s \in S} Z_s(r) \right) dr = \frac{\lambda}{p} \sum_{s \in S} \int_0^1 Z_s(r) dr \leq \frac{\lambda}{p} \sum_{s \in S} \int_0^p Z_s(r) dr = \frac{\lambda}{p} \sum_{s \in S} p \bar{x}_s \leq \lambda,$$

which is a contradiction. Thus, we have the existence of  $r \geq 0$  that satisfies  $d(X(r)) \geq \lambda/p$ .

From the definition of  $X(r)$ , we can enumerate all distinct sets of  $X(r)$  by putting  $r = p\bar{x}_s$  for all  $s \in S$ . This completes the proof.  $\square$

## References

Fredman, M. L. and Tarjan, R. E. Fibonacci heaps and their uses in improved network optimization algorithms. *Journal of the ACM*, 34(3):596–615, 1987.
